# Supplementary material for: Identification of genomic diversity and selection signatures in Luxi cattle using whole-genome sequencing data
Source: PubMed Central journal article supplement (PMC10915192; doi:10.5713/ab.23.0304), 2024-01-20
Supplement: ab-23-0304-Supplementary-Table-S3.pdf [file ab-23-0304-Supplementary-Table-S3.pdf]

**Supplementary Table S3.** Distribution of SNPs identified in LUX annotated by SnpEff.

| <b>Variants Type</b>                           | <b>Count</b> | <b>Percent</b> |
|------------------------------------------------|--------------|----------------|
| 3_prime_UTR_variant                            | 648,748      | 0.783%         |
| 5_prime_UTR_premature_start_codon_gain_variant | 25,965       | 0.031%         |
| 5_prime_UTR_variant                            | 149,518      | 0.180%         |
| downstream_gene_variant                        | 4,169,606    | 5.031%         |
| initiator_codon_variant                        | 42           | 0.000%         |
| intergenic_region                              | 17,829,235   | 21.514%        |
| intragenic_variant                             | 277,815      | 0.335%         |
| intron_variant                                 | 54,840,227   | 66.173%        |
| missense_variant                               | 239,036      | 0.288%         |
| non_coding_transcript_exon_variant             | 243,335      | 0.294%         |
| splice_acceptor_variant                        | 1,075        | 0.001%         |
| splice_donor_variant                           | 1,401        | 0.002%         |
| splice_region_variant                          | 90,096       | 0.109%         |
| start_lost                                     | 381          | 0.000%         |
| start_retained_variant                         | 53           | 0.000%         |
| stop_gained                                    | 2,151        | 0.003%         |
| stop_lost                                      | 298          | 0.000%         |
| stop_retained_variant                          | 384          | 0.000%         |
| synonymous_variant                             | 501,711      | 0.605%         |
| upstream_gene_variant                          | 3,852,636    | 4.649%         |

| <b>Region Type</b>   | <b>Count</b> | <b>Percent</b> |
|----------------------|--------------|----------------|
| DOWNSTREAM           | 4,169,606    | 5.037%         |
| EXON                 | 974,840      | 1.178%         |
| INTERGENIC           | 17,829,235   | 21.537%        |
| INTRON               | 54,768,088   | 66.158%        |
| SPLICE_SITE_ACCEPTOR | 1,075        | 0.001%         |
| SPLICE_SITE_DONOR    | 1,380        | 0.002%         |
| SPLICE_SITE_REGION   | 85,324       | 0.103%         |
| TRANSCRIPT           | 277,815      | 0.336%         |
| UPSTREAM             | 3,852,636    | 4.654%         |
| UTR_3_PRIME          | 648,748      | 0.784%         |
| UTR_5_PRIME          | 175,483      | 0.212%         |
