# Supplementary material for: Identification of genomic diversity and selection signatures in Luxi cattle using whole-genome sequencing data
Source: PubMed Central journal article supplement (PMC10915192; doi:10.5713/ab.23.0304), 2024-01-20
Supplement: ab-23-0304-Supplementary-Table-S8.pdf [file ab-23-0304-Supplementary-Table-S8.pdf]

**Supplementary Table S8.** A summary of genes overlapped by  $\pi$ ,  $F_{st}$  and XP-EHH methods in common regions.

| <b>Chromosome</b> | <b>Position start site(bp)</b> | <b>Position end site (bp)</b> | <b>Gene</b>    |
|-------------------|--------------------------------|-------------------------------|----------------|
| 1                 | 87250001                       | 87275000                      | <i>PEX5L</i>   |
| 2                 | 22797327                       | 22850000                      | <i>SP3</i>     |
| 5                 | 58854800                       | 58855759                      | <i>OR6C1N</i>  |
| 7                 | 12550001                       | 12575856                      | <i>NFIX</i>    |
| 7                 | 43404172                       | 43407636                      | <i>PRTN3</i>   |
| 7                 | 43411277                       | 43414454                      | <i>ELANE</i>   |
| 7                 | 43416200                       | 43418803                      | <i>CFD</i>     |
| 7                 | 43418785                       | 43436614                      | <i>MED16</i>   |
| 7                 | 43436675                       | 43436781                      | <i>U6</i>      |
| 7                 | 43439368                       | 43449545                      | <i>R3HDM4</i>  |
| 7                 | 43656058                       | 43670433                      | <i>STK11</i>   |
| 7                 | 43673071                       | 43679019                      | <i>CBARP</i>   |
| 7                 | 43683704                       | 43685876                      | <i>ATP5F1D</i> |
| 7                 | 43688529                       | 43698292                      | <i>MIDN</i>    |
| 7                 | 43707339                       | 43712131                      | <i>CIRBP</i>   |
| 7                 | 43713177                       | 43716027                      | <i>FAM174C</i> |
| 7                 | 43722703                       | 43725000                      | <i>EFNA2</i>   |
| 7                 | 43800001                       | 43804425                      | <i>PWWP3A</i>  |
| 7                 | 43805788                       | 43814284                      | <i>NDUFS7</i>  |
| 7                 | 43814700                       | 43817778                      | <i>GAMT</i>    |
| 7                 | 43824822                       | 43843948                      | <i>DAZAPI</i>  |
| 7                 | 43846494                       | 43848179                      | <i>RPS15</i>   |
| 7                 | 43947454                       | 43950000                      | <i>MEX3D</i>   |
| 7                 | 43976251                       | 43979203                      | <i>UQCR11</i>  |
| 7                 | 43981884                       | 44015020                      | <i>TCF3</i>    |
| 7                 | 44175001                       | 44182700                      | <i>KLF16</i>   |
| 7                 | 44190928                       | 44199228                      | <i>ABHD17A</i> |
| 8                 | 39351712                       | 39362934                      | <i>INSL6</i>   |
| 8                 | 39381277                       | 39400000                      | <i>JAK2</i>    |
| 8                 | 79000001                       | 79025000                      | <i>AGTPBP1</i> |
| 8                 | 79250001                       | 79255810                      | <i>NAA35</i>   |
| 8                 | 79263894                       | 79275000                      | <i>GOLM1</i>   |
| 9                 | 42650001                       | 42675000                      | <i>PDSS2</i>   |
| 14                | 14950001                       | 14975000                      | <i>NSMCE2</i>  |
| 14                | 23330541                       | 23375000                      | <i>PLAG1</i>   |
| 15                | 40374952                       | 40375000                      | <i>MICAL2</i>  |
| 16                | 43425001                       | 43450000                      | <i>UBE4B</i>   |
| 16                | 43747735                       | 43750000                      | <i>CLSTN1</i>  |
| 19                | 11075001                       | 11151673                      | <i>MED13</i>   |
| 19                | 11169421                       | 11175000                      | <i>INTS2</i>   |
| 19                | 11300001                       | 11350000                      | <i>BRIP1</i>   |
| 20                | 3700001                        | 3725000                       | <i>FBXW11</i>  |
| 21                | 1252109                        | 1253718                       | <i>NDN</i>     |
| 21                | 45875001                       | 45900000                      | <i>RALGAP1</i> |
| 22                | 49600001                       | 49650000                      | <i>DOCK3</i>   |
