# Supplementary material for: Identification of genomic diversity and selection signatures in Luxi cattle using whole-genome sequencing data
Source: PubMed Central journal article supplement (PMC10915192; doi:10.5713/ab.23.0304), 2024-01-20
Supplement: ab-23-0304-Supplementary-Table-S10.pdf [file ab-23-0304-Supplementary-Table-S10.pdf]

**Supplementary Table S10.** QTLs Overlapped with Candidate Selected Regions.

| Chromosome | QTL traits           | QTL start site(bp) | QTL end site (bp) | QTL information |
|------------|----------------------|--------------------|-------------------|-----------------|
| 1          | Meat_and_Carcass_QTL | 24549201           | 94402650          | QTL_ID=12199    |
| 1          | Reproduction_QTL     | 50246903           | 102544700         | QTL_ID=3439     |
| 1          | Milk_QTL             | 60296283           | 144690571         | QTL_ID=21533    |
| 1          | Health_QTL           | 67679502           | 112799170         | QTL_ID=9947     |
| 1          | Exterior_QTL         | 78446695           | 102247320         | QTL_ID=7124     |
| 1          | Reproduction_QTL     | 78446695           | 125412168         | QTL_ID=5658     |
| 1          | Health_QTL           | 78449771           | 101673070         | QTL_ID=1736     |
| 1          | Meat_and_Carcass_QTL | 79656722           | 89336942          | QTL_ID=10643    |
| 1          | Milk_QTL             | 79656722           | 125412168         | QTL_ID=2508     |
| 1          | Production_QTL       | 85829913           | 93623311          | QTL_ID=5266     |
| 2          | Milk_Association     | 0                  | 136230987         | QTL_ID=9943     |
| 2          | Exterior_Association | 0                  | 136230987         | QTL_ID=9944     |
| 2          | Milk_QTL             | 4078468            | 40208237          | QTL_ID=1675     |
| 2          | Meat_and_Carcass_QTL | 6872895            | 104870360         | QTL_ID=12152    |
| 2          | Meat_and_Carcass_QTL | 12597135           | 24443308          | QTL_ID=1312     |
| 2          | Production_QTL       | 12597135           | 32502936          | QTL_ID=1549     |
| 2          | Exterior_QTL         | 12597135           | 32502936          | QTL_ID=1550     |
| 2          | Milk_QTL             | 12597135           | 32502936          | QTL_ID=2651     |
| 2          | Production_QTL       | 12599250           | 27468313          | QTL_ID=2613     |
| 2          | Production_QTL       | 12599250           | 27468313          | QTL_ID=2615     |
| 2          | Production_QTL       | 16394257           | 26548119          | QTL_ID=5379     |
| 2          | Meat_and_Carcass_QTL | 19175992           | 27468313          | QTL_ID=4857     |
| 2          | Production_QTL       | 20854552           | 27468313          | QTL_ID=1304     |
| 2          | Meat_and_Carcass_QTL | 21725034           | 24443308          | QTL_ID=10657    |
| 2          | Meat_and_Carcass_QTL | 22211574           | 63461640          | QTL_ID=1322     |
| 5          | Milk_QTL             | 4693754            | 92900908          | QTL_ID=10437    |
| 5          | Milk_QTL             | 6110736            | 90863996          | QTL_ID=10435    |
| 5          | Milk_QTL             | 7439157            | 93609399          | QTL_ID=10436    |
| 5          | Health_QTL           | 11185304           | 103882522         | QTL_ID=9915     |
| 5          | Milk_QTL             | 17889402           | 109284767         | QTL_ID=21534    |
| 5          | Production_QTL       | 26568420           | 66421050          | QTL_ID=37668    |
| 5          | Exterior_QTL         | 28561051           | 61718439          | QTL_ID=10278    |
| 5          | Milk_QTL             | 28561051           | 61718439          | QTL_ID=10279    |
| 5          | Milk_QTL             | 30199437           | 95911996          | QTL_ID=10438    |
| 5          | Milk_QTL             | 31882104           | 117786662         | QTL_ID=9993     |
| 5          | Meat_and_Carcass_QTL | 36310174           | 66421050          | QTL_ID=1362     |
| 5          | Production_QTL       | 37195788           | 60221752          | QTL_ID=4901     |
| 5          | Production_QTL       | 40301636           | 63551660          | QTL_ID=1301     |
| 5          | Production_QTL       | 40301636           | 63551660          | QTL_ID=1305     |
| 5          | Reproduction_QTL     | 41623858           | 72620348          | QTL_ID=1376     |
| 5          | Health_QTL           | 46131633           | 70973105          | QTL_ID=2659     |
| 5          | Meat_and_Carcass_QTL | 46406173           | 80449175          | QTL_ID=1365     |
| 5          | Milk_QTL             | 46406173           | 80449175          | QTL_ID=4495     |
| 5          | Meat_and_Carcass_QTL | 46937542           | 62878594          | QTL_ID=4904     |
| 5          | Milk_QTL             | 47578726           | 62648334          | QTL_ID=2429     |
| 5          | Production_QTL       | 47823156           | 113358592         | QTL_ID=3422     |
| 5          | Health_QTL           | 49594384           | 63551660          | QTL_ID=4973     |
| 5          | Health_QTL           | 49860068           | 77491225          | QTL_ID=5117     |
| 5          | Meat_and_Carcass_QTL | 54908068           | 70849120          | QTL_ID=4903     |
| 5          | Meat_and_Carcass_QTL | 54908068           | 79705260          | QTL_ID=1363     |

|   |                          |          |           |               |
|---|--------------------------|----------|-----------|---------------|
| 5 | Meat_and_Carcass_QTL     | 56679296 | 61992980  | QTL_ID=1364   |
| 5 | Milk_QTL                 | 57564910 | 66421050  | QTL_ID=9997   |
| 5 | Production_QTL           | 57715464 | 58919899  | QTL_ID=1295   |
| 5 | Reproduction_QTL         | 57715464 | 65712558  | QTL_ID=10732  |
| 5 | Meat_and_Carcass_QTL     | 57715464 | 65712558  | QTL_ID=10731  |
| 5 | Production_Association   | 58627646 | 63551660  | QTL_ID=3406   |
| 5 | Meat_and_Carcass_QTL     | 58627646 | 63551660  | QTL_ID=3543   |
| 5 | Reproduction_QTL         | 58627646 | 65712558  | QTL_ID=1758   |
| 5 | Reproduction_QTL         | 58627646 | 65712558  | QTL_ID=1761   |
| 7 | Milk_QTL                 | 0        | 93365497  | QTL_ID=21539  |
| 7 | Reproduction_QTL         | 0        | 13682170  | QTL_ID=2699   |
| 7 | Reproduction_QTL         | 0        | 13682170  | QTL_ID=2700   |
| 7 | Milk_QTL                 | 0        | 13682170  | QTL_ID=3533   |
| 7 | Milk_QTL                 | 0        | 13682170  | QTL_ID=3535   |
| 7 | Reproduction_QTL         | 0        | 13682170  | QTL_ID=10782  |
| 7 | Reproduction_QTL         | 4002545  | 27119287  | QTL_ID=5386   |
| 7 | Health_QTL               | 4574337  | 94754136  | QTL_ID=9916   |
| 7 | Production_QTL           | 6869674  | 13682170  | QTL_ID=10783  |
| 7 | Production_QTL           | 6869674  | 26171745  | QTL_ID=10786  |
| 7 | Production_QTL           | 7923406  | 46805275  | QTL_ID=5274   |
| 7 | Production_QTL           | 9557098  | 39617031  | QTL_ID=5275   |
| 7 | Exterior_QTL             | 11435844 | 98021520  | QTL_ID=3449   |
| 7 | Health_QTL               | 12412818 | 12912814  | QTL_ID=263363 |
| 7 | Reproduction_QTL         | 20421150 | 57996066  | QTL_ID=9927   |
| 7 | Exterior_QTL             | 20739719 | 69693300  | QTL_ID=7132   |
| 7 | Reproduction_QTL         | 32126553 | 47826333  | QTL_ID=3538   |
| 7 | Meat_and_Carcass_QTL     | 35941224 | 57996066  | QTL_ID=1327   |
| 7 | Production_QTL           | 39126923 | 47826333  | QTL_ID=10793  |
| 7 | Production_QTL           | 39126923 | 47826333  | QTL_ID=10792  |
| 7 | Production_QTL           | 39126923 | 47826333  | QTL_ID=10791  |
| 7 | Meat_and_Carcass_QTL     | 39126923 | 47826333  | QTL_ID=10790  |
| 7 | Production_QTL           | 42067569 | 46805275  | QTL_ID=5277   |
| 7 | Milk_QTL                 | 42475992 | 80867754  | QTL_ID=3434   |
| 7 | Production_QTL           | 43521554 | 46110956  | QTL_ID=4350   |
| 7 | Health_Association       | 43666502 | 43666506  | QTL_ID=57601  |
| 7 | Production_QTL           | 43684924 | 43848293  | QTL_ID=4544   |
| 7 | Milk_Association         | 43684924 | 43848293  | QTL_ID=6185   |
| 7 | Reproduction_Association | 43807450 | 43970820  | QTL_ID=10092  |
| 8 | Meat_and_Carcass_QTL     | 9692980  | 41415460  | QTL_ID=2548   |
| 8 | Reproduction_QTL         | 24012155 | 47804015  | QTL_ID=11443  |
| 8 | Milk_QTL                 | 24673040 | 51108440  | QTL_ID=3438   |
| 8 | Production_QTL           | 25140065 | 55540775  | QTL_ID=7089   |
| 8 | Production_QTL           | 36657088 | 44155929  | QTL_ID=10827  |
| 8 | Meat_and_Carcass_QTL     | 36657088 | 58184315  | QTL_ID=10826  |
| 8 | Production_QTL           | 36657088 | 58184315  | QTL_ID=10825  |
| 8 | Milk_Association         | 39359625 | 39359629  | QTL_ID=215577 |
| 8 | Reproduction_QTL         | 44155929 | 81703009  | QTL_ID=11442  |
| 8 | Exterior_QTL             | 62616650 | 104596066 | QTL_ID=3599   |
| 8 | Reproduction_QTL         | 62616650 | 104596066 | QTL_ID=4657   |
| 8 | Reproduction_QTL         | 62616650 | 104596066 | QTL_ID=4658   |
| 8 | Reproduction_QTL         | 74001496 | 81703009  | QTL_ID=10833  |
| 8 | Meat_and_Carcass_QTL     | 74001496 | 104596066 | QTL_ID=10834  |

|    |                      |          |          |               |
|----|----------------------|----------|----------|---------------|
| 8  | Milk_Association     | 79023037 | 79023041 | QTL_ID=33791  |
| 9  | Milk_QTL             | 11580914 | 70439207 | QTL_ID=3747   |
| 9  | Milk_QTL             | 19801092 | 94009774 | QTL_ID=21540  |
| 9  | Meat_and_Carcass_QTL | 21917447 | 45097442 | QTL_ID=4507   |
| 9  | Exterior_QTL         | 28084852 | 45406266 | QTL_ID=7135   |
| 9  | Health_QTL           | 28084852 | 45406266 | QTL_ID=66184  |
| 9  | Exterior_QTL         | 30728025 | 74499340 | QTL_ID=10292  |
| 9  | Reproduction_QTL     | 30728025 | 74499340 | QTL_ID=10293  |
| 9  | Exterior_QTL         | 36332280 | 50865192 | QTL_ID=3441   |
| 9  | Milk_QTL             | 38584881 | 45406266 | QTL_ID=1687   |
| 9  | Exterior_QTL         | 38584881 | 45406266 | QTL_ID=1688   |
| 9  | Milk_QTL             | 38584881 | 45406266 | QTL_ID=1689   |
| 9  | Reproduction_QTL     | 38584881 | 51846163 | QTL_ID=10854  |
| 9  | Milk_QTL             | 39792929 | 45406266 | QTL_ID=3754   |
| 9  | Milk_QTL             | 39792929 | 70439207 | QTL_ID=3745   |
| 9  | Health_QTL           | 39792929 | 74081518 | QTL_ID=10085  |
| 9  | Health_QTL           | 41536879 | 82637770 | QTL_ID=10076  |
| 9  | Meat_and_Carcass_QTL | 41782122 | 69031332 | QTL_ID=4906   |
| 14 | Meat_and_Carcass_QTL | 0        | 17448178 | QTL_ID=1332   |
| 14 | Meat_and_Carcass_QTL | 0        | 19034376 | QTL_ID=1333   |
| 14 | Milk_QTL             | 0        | 19827475 | QTL_ID=3407   |
| 14 | Milk_QTL             | 0        | 26418127 | QTL_ID=3618   |
| 14 | Production_QTL       | 0        | 26418127 | QTL_ID=10954  |
| 14 | Milk_QTL             | 0        | 33310158 | QTL_ID=3408   |
| 14 | Milk_QTL             | 0        | 55516930 | QTL_ID=3413   |
| 14 | Milk_QTL             | 0        | 82402986 | QTL_ID=10099  |
| 14 | Milk_QTL             | 0        | 82402986 | QTL_ID=10100  |
| 14 | Milk_QTL             | 0        | 82402986 | QTL_ID=10101  |
| 14 | Health_QTL           | 4044804  | 74154756 | QTL_ID=9917   |
| 14 | Milk_QTL             | 4064632  | 26418127 | QTL_ID=3620   |
| 14 | Meat_and_Carcass_QTL | 4064632  | 34602909 | QTL_ID=4833   |
| 14 | Health_QTL           | 4064632  | 34602909 | QTL_ID=66189  |
| 14 | Reproduction_QTL     | 4837903  | 38703231 | QTL_ID=5374   |
| 14 | Production_QTL       | 4837903  | 67651344 | QTL_ID=5375   |
| 14 | Milk_QTL             | 8327539  | 48125247 | QTL_ID=2604   |
| 14 | Health_QTL           | 8327539  | 48125247 | QTL_ID=3177   |
| 14 | Meat_and_Carcass_QTL | 8724089  | 15861980 | QTL_ID=1370   |
| 14 | Milk_QTL             | 11111316 | 20382644 | QTL_ID=2675   |
| 14 | Reproduction_QTL     | 11111316 | 26418127 | QTL_ID=10958  |
| 14 | Production_QTL       | 11111316 | 33072228 | QTL_ID=2627   |
| 14 | Production_QTL       | 14148886 | 33072228 | QTL_ID=1734   |
| 14 | Meat_and_Carcass_QTL | 14148886 | 34602909 | QTL_ID=10960  |
| 14 | Meat_and_Carcass_QTL | 14156817 | 16885077 | QTL_ID=1408   |
| 14 | Milk_Association     | 14961324 | 14961328 | QTL_ID=248215 |
| 14 | Milk_QTL             | 20382644 | 41534594 | QTL_ID=2732   |
| 14 | Milk_QTL             | 20382644 | 41534594 | QTL_ID=2733   |
| 14 | Health_QTL           | 20382644 | 41534594 | QTL_ID=2734   |
| 14 | Health_QTL           | 20382644 | 41534594 | QTL_ID=2776   |
| 14 | Meat_and_Carcass_QTL | 23325171 | 24301941 | QTL_ID=222287 |
| 14 | Meat_and_Carcass_QTL | 23330541 | 23375751 | QTL_ID=223755 |
| 14 | Health_Association   | 23338888 | 23338892 | QTL_ID=71512  |
| 14 | Exterior_Association | 23338888 | 23338892 | QTL_ID=95575  |

|    |                              |          |          |               |
|----|------------------------------|----------|----------|---------------|
| 14 | Exterior_Association         | 23338888 | 23338892 | QTL_ID=95592  |
| 14 | Exterior_Association         | 23338888 | 23338892 | QTL_ID=95593  |
| 14 | Production_Association       | 23338888 | 23338892 | QTL_ID=102021 |
| 14 | Production_Association       | 23338888 | 23338892 | QTL_ID=102022 |
| 14 | Production_Association       | 23338888 | 23338892 | QTL_ID=102023 |
| 14 | Production_Association       | 23338888 | 23338892 | QTL_ID=102031 |
| 14 | Production_Association       | 23338888 | 23338892 | QTL_ID=102032 |
| 14 | Production_Association       | 23338888 | 23338892 | QTL_ID=102033 |
| 14 | Meat_and_Carcass_Association | 23338888 | 23338892 | QTL_ID=125067 |
| 14 | Meat_and_Carcass_Association | 23338888 | 23338892 | QTL_ID=125071 |
| 14 | Meat_and_Carcass_Association | 23338888 | 23338892 | QTL_ID=125081 |
| 14 | Exterior_Association         | 23338888 | 23338892 | QTL_ID=154178 |
| 14 | Exterior_Association         | 23338888 | 23338892 | QTL_ID=154312 |
| 14 | Exterior_Association         | 23338888 | 23338892 | QTL_ID=154313 |
| 14 | Exterior_Association         | 23338888 | 23338892 | QTL_ID=154314 |
| 14 | Milk_Association             | 23338888 | 23338892 | QTL_ID=161530 |
| 14 | Milk_Association             | 23338888 | 23338892 | QTL_ID=161531 |
| 14 | Milk_Association             | 23338888 | 23338892 | QTL_ID=161532 |
| 14 | Milk_Association             | 23338888 | 23338892 | QTL_ID=161533 |
| 14 | Milk_Association             | 23338888 | 23338892 | QTL_ID=161534 |
| 14 | Production_Association       | 23338888 | 23338892 | QTL_ID=161535 |
| 14 | Production_Association       | 23338888 | 23338892 | QTL_ID=161536 |
| 14 | Production_Association       | 23338888 | 23338892 | QTL_ID=161537 |
| 14 | Reproduction_Association     | 23338888 | 23338892 | QTL_ID=169796 |
| 14 | Production_Association       | 23338888 | 23338892 | QTL_ID=172041 |
| 14 | Production_Association       | 23338888 | 23338892 | QTL_ID=180498 |
| 14 | Production_Association       | 23338888 | 23338892 | QTL_ID=182249 |
| 14 | Production_Association       | 23338888 | 23338892 | QTL_ID=184269 |
| 14 | Production_Association       | 23338888 | 23338892 | QTL_ID=186948 |
| 14 | Meat_and_Carcass_Association | 23338888 | 23338892 | QTL_ID=190494 |
| 14 | Meat_and_Carcass_Association | 23338888 | 23338892 | QTL_ID=191918 |
| 14 | Exterior_Association         | 23338888 | 23338892 | QTL_ID=214876 |
| 14 | Production_Association       | 23343148 | 23343152 | QTL_ID=20871  |
| 14 | Production_Association       | 23343148 | 23343152 | QTL_ID=20872  |
| 14 | Production_Association       | 23343148 | 23343152 | QTL_ID=20873  |
| 14 | Meat_and_Carcass_Association | 23343148 | 23343152 | QTL_ID=36553  |
| 14 | Production_Association       | 23343148 | 23343152 | QTL_ID=185277 |
| 14 | Production_Association       | 23343148 | 23343152 | QTL_ID=188452 |
| 14 | Meat_and_Carcass_Association | 23343148 | 23343152 | QTL_ID=190946 |
| 14 | Production_Association       | 23346063 | 23346067 | QTL_ID=185383 |
| 14 | Production_Association       | 23346063 | 23346067 | QTL_ID=188608 |
| 14 | Meat_and_Carcass_Association | 23346063 | 23346067 | QTL_ID=190987 |
| 14 | Production_Association       | 23354420 | 23354424 | QTL_ID=184873 |
| 14 | Production_Association       | 23354420 | 23354424 | QTL_ID=187837 |
| 14 | Meat_and_Carcass_Association | 23354420 | 23354424 | QTL_ID=190809 |
| 14 | Production_Association       | 23354567 | 23354571 | QTL_ID=185144 |
| 14 | Production_Association       | 23354567 | 23354571 | QTL_ID=188255 |
| 14 | Meat_and_Carcass_Association | 23354567 | 23354571 | QTL_ID=190903 |
| 15 | Exterior_QTL                 | 12367579 | 42062169 | QTL_ID=1699   |
| 15 | Meat_and_Carcass_QTL         | 16273131 | 53468859 | QTL_ID=1335   |
| 15 | Milk_QTL                     | 27896796 | 47037097 | QTL_ID=21547  |
| 15 | Meat_and_Carcass_QTL         | 29415621 | 42069918 | QTL_ID=10995  |

|    |                          |          |          |               |
|----|--------------------------|----------|----------|---------------|
| 15 | Meat_and_Carcass_QTL     | 29415621 | 42069918 | QTL_ID=10994  |
| 15 | Production_QTL           | 29415621 | 42069918 | QTL_ID=10993  |
| 15 | Meat_and_Carcass_QTL     | 30275772 | 57056696 | QTL_ID=12195  |
| 15 | Exterior_QTL             | 37363108 | 42062169 | QTL_ID=1596   |
| 15 | Exterior_QTL             | 37363108 | 42062169 | QTL_ID=1598   |
| 15 | Exterior_QTL             | 37363108 | 42062169 | QTL_ID=1601   |
| 15 | Health_QTL               | 37363108 | 42062169 | QTL_ID=2678   |
| 16 | Meat_and_Carcass_QTL     | 21443600 | 47175920 | QTL_ID=1353   |
| 16 | Meat_and_Carcass_QTL     | 27447808 | 48891408 | QTL_ID=1355   |
| 16 | Meat_and_Carcass_QTL     | 29780871 | 46403950 | QTL_ID=11022  |
| 16 | Health_QTL               | 33023144 | 56525329 | QTL_ID=5123   |
| 16 | Meat_and_Carcass_QTL     | 33057453 | 46378218 | QTL_ID=4837   |
| 16 | Meat_and_Carcass_QTL     | 37509145 | 46403950 | QTL_ID=11024  |
| 16 | Production_QTL           | 37509145 | 55924908 | QTL_ID=11025  |
| 19 | Meat_and_Carcass_QTL     | 0        | 21420040 | QTL_ID=1339   |
| 19 | Milk_QTL                 | 1389408  | 52681720 | QTL_ID=10444  |
| 19 | Milk_QTL                 | 2373572  | 59397192 | QTL_ID=10445  |
| 19 | Health_QTL               | 2373572  | 61307628 | QTL_ID=10446  |
| 19 | Milk_QTL                 | 6368120  | 53839560 | QTL_ID=10027  |
| 19 | Milk_QTL                 | 8162772  | 34966768 | QTL_ID=10443  |
| 19 | Meat_and_Carcass_QTL     | 9262720  | 44576840 | QTL_ID=10021  |
| 19 | Reproduction_QTL         | 9285876  | 26584006 | QTL_ID=4668   |
| 19 | Meat_and_Carcass_QTL     | 9288192  | 22577880 | QTL_ID=1396   |
| 19 | Meat_and_Carcass_QTL     | 9288192  | 22577880 | QTL_ID=1397   |
| 19 | Meat_and_Carcass_QTL     | 9288192  | 22577880 | QTL_ID=1398   |
| 19 | Meat_and_Carcass_QTL     | 9288192  | 22577880 | QTL_ID=1399   |
| 19 | Health_QTL               | 10362668 | 22577880 | QTL_ID=3623   |
| 19 | Meat_and_Carcass_QTL     | 10877906 | 25073025 | QTL_ID=11077  |
| 19 | Production_QTL           | 10877906 | 25073025 | QTL_ID=11075  |
| 19 | Production_QTL           | 10877906 | 25073025 | QTL_ID=11076  |
| 19 | Production_QTL           | 10970534 | 11086318 | QTL_ID=4452   |
| 19 | Reproduction_Association | 11102150 | 11102154 | QTL_ID=146102 |
| 20 | Meat_and_Carcass_QTL     | 0        | 7148862  | QTL_ID=11094  |
| 20 | Milk_QTL                 | 0        | 17499005 | QTL_ID=2750   |
| 20 | Milk_QTL                 | 0        | 27647821 | QTL_ID=2564   |
| 20 | Meat_and_Carcass_QTL     | 0        | 27647821 | QTL_ID=12250  |
| 20 | Health_QTL               | 0        | 27647821 | QTL_ID=66202  |
| 20 | Health_QTL               | 0        | 27647821 | QTL_ID=66204  |
| 20 | Health_QTL               | 0        | 27647821 | QTL_ID=66205  |
| 20 | Health_QTL               | 0        | 27647821 | QTL_ID=66206  |
| 20 | Health_QTL               | 0        | 27647821 | QTL_ID=66208  |
| 20 | Health_QTL               | 0        | 27647821 | QTL_ID=66209  |
| 20 | Health_QTL               | 0        | 27647821 | QTL_ID=66210  |
| 20 | Milk_QTL                 | 0        | 71974585 | QTL_ID=10103  |
| 20 | Health_QTL               | 546708   | 10795320 | QTL_ID=4561   |
| 20 | Production_QTL           | 546708   | 16612990 | QTL_ID=1357   |
| 20 | Health_QTL               | 1735582  | 30372685 | QTL_ID=9948   |
| 21 | Meat_and_Carcass_QTL     | 0        | 9139379  | QTL_ID=11114  |
| 21 | Reproduction_QTL         | 0        | 10506951 | QTL_ID=1721   |
| 21 | Reproduction_QTL         | 0        | 31529191 | QTL_ID=11389  |
| 21 | Production_QTL           | 250165   | 9506289  | QTL_ID=5300   |
| 21 | Health_QTL               | 29928132 | 52267911 | QTL_ID=5446   |

|    |                      |          |          |              |
|----|----------------------|----------|----------|--------------|
| 21 | Milk_QTL             | 33438788 | 48949049 | QTL_ID=10165 |
| 21 | Production_QTL       | 34781343 | 52267911 | QTL_ID=1358  |
| 21 | Reproduction_QTL     | 35957121 | 51067117 | QTL_ID=11126 |
| 21 | Health_QTL           | 43470425 | 57888296 | QTL_ID=66212 |
| 22 | Meat_and_Carcass_QTL | 37284662 | 57206606 | QTL_ID=1315  |
| 22 | Exterior_QTL         | 44203537 | 57206606 | QTL_ID=1628  |
| 22 | Milk_QTL             | 44203537 | 57206606 | QTL_ID=2686  |
| 22 | Reproduction_QTL     | 44203537 | 57206606 | QTL_ID=4671  |
| 22 | Production_QTL       | 44203537 | 57206606 | QTL_ID=11151 |
| 22 | Milk_QTL             | 44838170 | 55281324 | QTL_ID=1536  |
| 22 | Milk_QTL             | 44838170 | 55281324 | QTL_ID=1537  |
| 22 | Meat_and_Carcass_QTL | 48797725 | 58889762 | QTL_ID=11152 |
| 22 | Production_QTL       | 48797725 | 60772965 | QTL_ID=11155 |

---
